# Supplementary material for: 7-Geranyloxycinnamic Acid Isolated from Melicope lunu-ankenda Leaves Perturbs Colon Cancer and Breast Cancer Cell Lines’ Growth via Induction of Apoptotic Pathway
Source: MDPI journal article supplement (doi:10.3390/molecules28083612), 2023-04-21
Supplement: s1 [file s1]

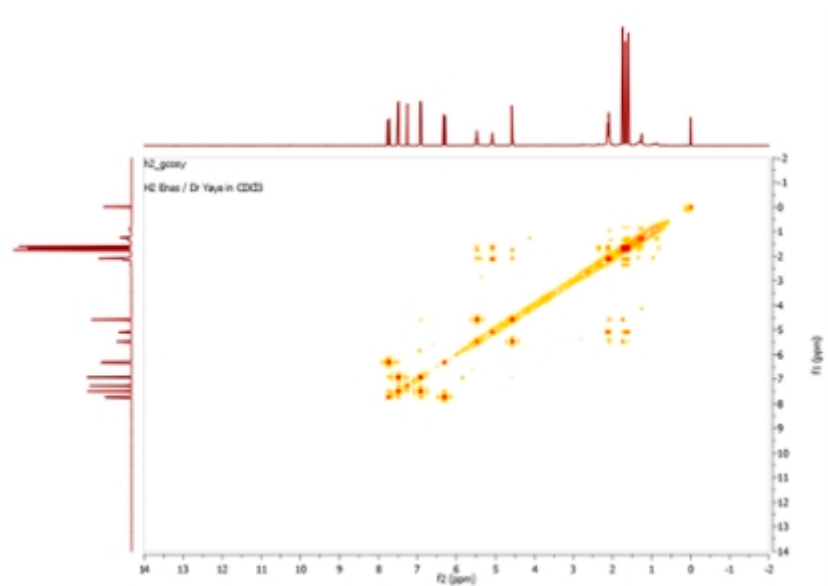

Figure S1: gCOSY NMR spectrogram

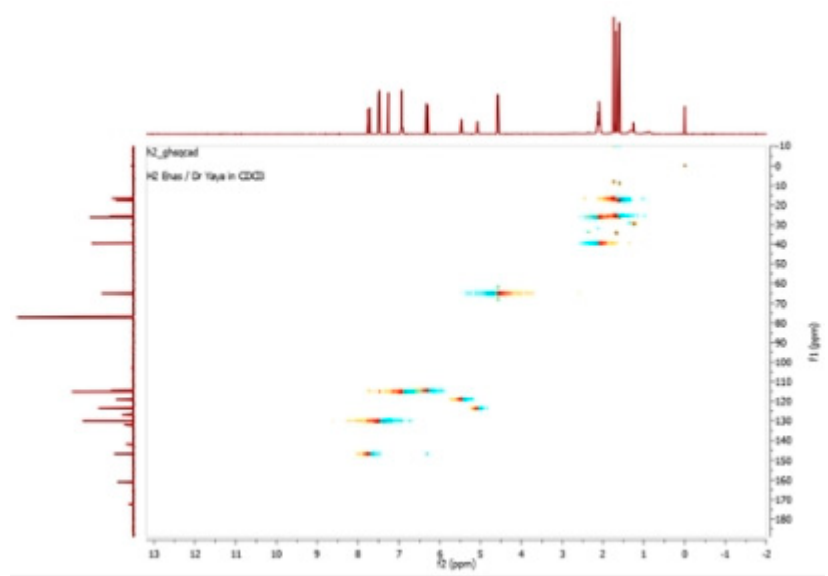

Figure S2: gHSQCAD NMR spectrogram QC

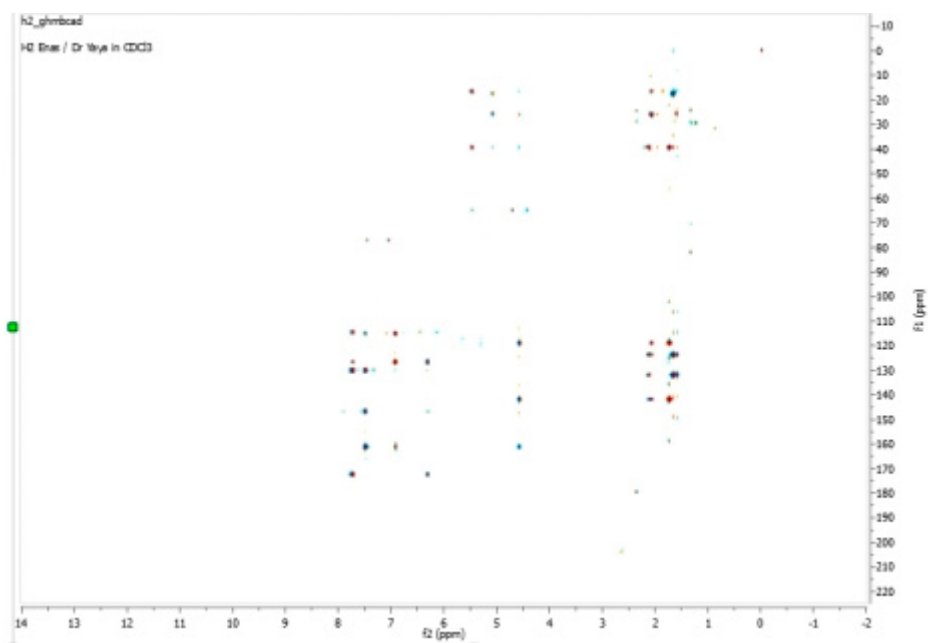

Figure S3: gHMBCAD spectrogram.
